# Supplementary material for: Selective extraction of natural products with benign solvents and recovery by organophilic pervaporation: fractionation of d-limonene from orange peels
Source: Royal Society of Chemistry journal article supplement (doi:10.1039/c0gc00339e), 2010-01-01
Supplement: c0gc00339e.pdf [file c0gc00339e.pdf]

## **Supporting Information for**

# **Selective extraction of natural products with benign solvents and recovery by organophilic pervaporation: fractionation of D-limonene from orange peels**

Prashant S. Kulkarni,<sup>a,b</sup> Carla Brazinha,<sup>b</sup> Carlos A. M. Afonso<sup>a,c</sup> and João G. Crespo<sup>\*b</sup>

a) CQFM- Centro de Química e Física Molecular and IN – Institute of Nanoscience and Nanotechnology, Instituto Superior Técnico, Complexo I, Av. Rovisco Pais, 1049-001 Lisboa, Portugal

b) REQUIMTE/CQFB, Departamento de Química, FCT, Universidade Nova de Lisboa, 2829-516 Caparica, Portugal

c) iMed.UL, Faculdade de Farmácia da Universidade de Lisboa, Av. Prof. Gama Pinto, 1649-003 Lisboa, Portugal.

## **Index**

**Figure 1:** <sup>1</sup>H NMR spectra of PEG before (upper) and after pervaporation experiment (lower) in solvent dichloromethane.

**Table 1:** Physico-chemical properties of the compounds that are observed in orange peels

**Table 2:** GC retention time of the compounds that are observed in orange peels

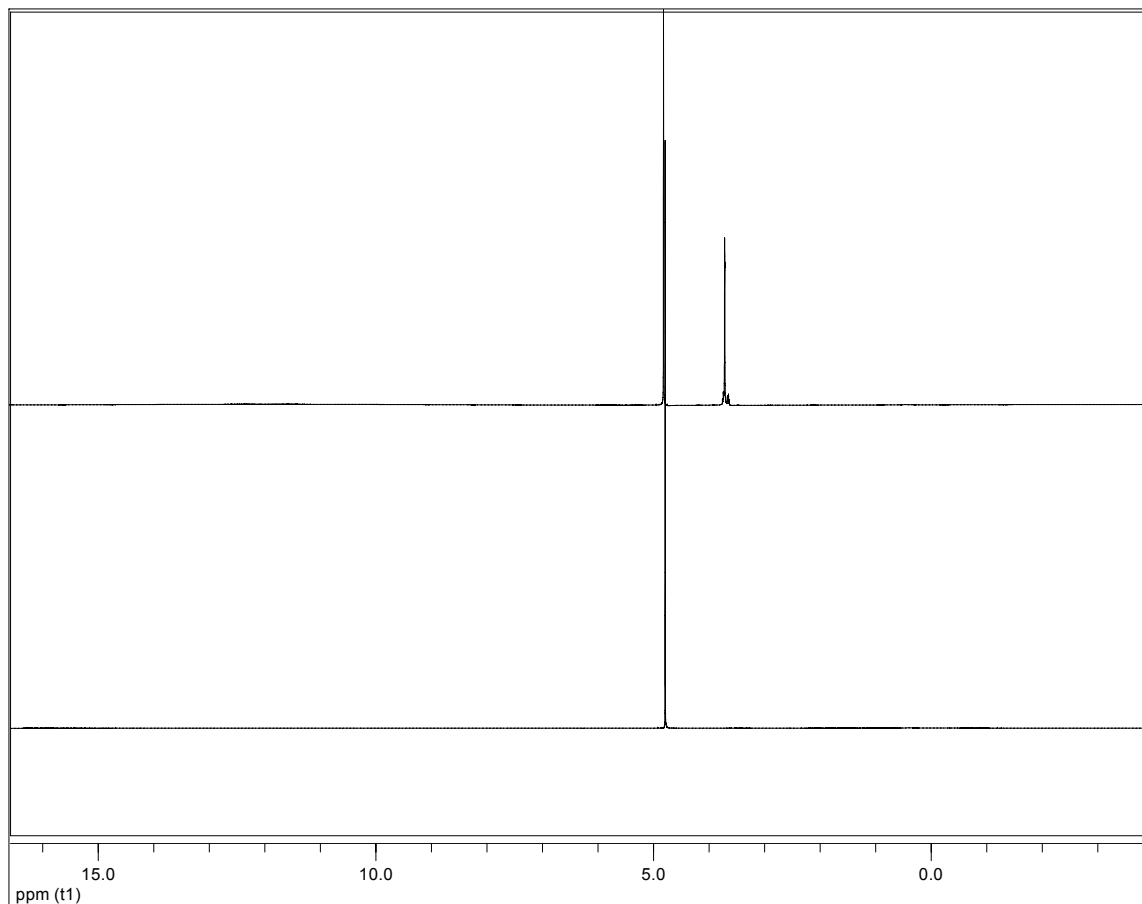

**Figure 1:** <sup>1</sup>H NMR spectra of PEG in the feed before (upper) and of the permeate after pervaporation experiment (lower) in solvent dichloromethane.

**Table 1:** Physico-chemical properties of the compounds that are observed in orange peels

| Compound             | Molecular Formula                 | Molecular Weight (g/mole) | Vapour Pressure (mbar at 20 °C) | Boiling Point (°C) |
|----------------------|-----------------------------------|---------------------------|---------------------------------|--------------------|
| $\alpha$ - Pinene    | C <sub>10</sub> H <sub>16</sub>   | 136.24                    | 4                               | 155                |
| $\beta$ - Pinene     | C <sub>10</sub> H <sub>16</sub>   | 136.24                    | 3.91                            | 164                |
| Myrcene              | C <sub>10</sub> H <sub>16</sub>   | 136.24                    | 9                               | 168                |
| Octanal              | C <sub>8</sub> H <sub>16</sub> O  | 128.21                    | 3                               | 169                |
| 3-Carene             | C <sub>10</sub> H <sub>16</sub>   | 136.24                    | 5                               | 169                |
| Limonene             | C <sub>10</sub> H <sub>16</sub>   | 136.24                    | 3                               | 176                |
| Octanol              | C <sub>8</sub> H <sub>18</sub> O  | 130.23                    | < 0.1                           | 195                |
| Nerol                | C <sub>10</sub> H <sub>18</sub> O | 154.25                    | 0.03                            | 224                |
| Linalool             | C <sub>10</sub> H <sub>18</sub> O | 154.25                    | 0.09                            | 199                |
| $\alpha$ - Terpineol | C <sub>10</sub> H <sub>18</sub> O | 154.25                    | 0.05                            | 219                |

**Table 2:** GC retention time of the compounds that are observed in orange peels

| Compounds        | GC Retention Time*<br>(min) |
|------------------|-----------------------------|
| $\alpha$ -Pinene | 7.08                        |
| $\beta$ -Pinene  | 9.07                        |
| Myrcene          | 9.36                        |
| Octanal          | 10.46                       |
| 3-Carene         | 10.72                       |
| Limonene         | 11.97                       |
| Octanol          | 12.34                       |
| Nerol            | 13.87                       |
| Linalool         | 29.71                       |
| Terpineol        | 38.76                       |

\*The standard deviation of the retention times, for the different compounds analysed, was found to be always lower than 5%.

**Conditions:**

The Gas Chromatograph used (GC-2014, Shimadzu Corporation, Japan) was controlled by GC Solution software, using a packed Carbowax-10 column with 22m x 0.32 mm and 0.25  $\mu$ m film thickness. The oven temperature was initially set at 70°C and then increased from 70°-250°C at 2°C/min and held isothermal for 60 min. The injectors were set at 250°C, with a split ratio of 1/50 for FID. The FID detector was maintained at 270°C. The sample volume injected was 50  $\mu$ l. The carrier gas was hydrogen, at a constant flow rate of 0.95 ml/min.
